# Supplementary material for: Immune-mediated genetic pathways resulting in pulmonary function impairment increase lung cancer susceptibility
Source: PubMed Central journal article supplement (PMC6946810; doi:10.1038/s41467-019-13855-2), 2020-01-07
Supplement: 41467_2019_13855_MOESM2_ESM.pdf [file 41467_2019_13855_MOESM2_ESM.pdf]

## **Description of Additional Supplementary Files**

**Supplementary Data 1:** Summary statistics for FEV<sub>1</sub> genetic instruments based on a GWAS conducted in the UK Biobank

**Supplementary Data 2:** Summary statistics for FEV<sub>1</sub>/FVC genetic instruments based on a GWAS conducted in the UK Biobank

**Supplementary Data 3:** Summary statistics for FVC genetic instruments based on a GWAS conducted in the UK Biobank

**Supplementary Data 4:** Summary statistics for FEV<sub>1</sub> genetic instruments in never smokers based on a GWAS conducted in the UK Biobank

**Supplementary Data 5:** Summary statistics for FEV<sub>1</sub>/FVC genetic instruments in never smokers based on a GWAS conducted in the UK Biobank

**Supplementary Data 6:** Summary statistics for FVC genetic instruments in never smokers based on a GWAS conducted in the UK Biobank

**Supplementary Data 7:** Lung expression quantitative trait loci (eQTL) association estimates for FEV<sub>1</sub> and FEV<sub>1</sub>/FVC genetic instruments

**Supplementary Data 8:** Protein quantitative trait loci (pQTL) association estimates for FEV<sub>1</sub> and FEV<sub>1</sub>/FVC genetic instruments
